# Supplementary material for: The Association between Survivorship Care Plans and Patient-Reported Satisfaction and Confidence with Follow-Up Cancer Care Provided by Primary Care Providers
Source: MDPI journal article supplement (doi:10.3390/curroncol29100577), 2022-09-30
Supplement: s1 [file s1]

**Table S1.** Multinomial Logistic Regression for Clinician Type

|                              | Both  |       |         |       | General Practitioner |        |         |       |
|------------------------------|-------|-------|---------|-------|----------------------|--------|---------|-------|
|                              | RR    | 95%CI | P-Value |       | RR                   | 95% CI | P-Value |       |
| (Intercept)                  | 0.53  | 0.36  | 0.77    | 0.001 | 0.08                 | 0.04   | 0.16    | 0.000 |
| No Careplan Received         | (ref) |       |         |       | (ref)                |        |         |       |
| Careplan Received            | 1.48  | 1.32  | 1.67    | 0.000 | 1.34                 | 1.18   | 1.53    | 0.000 |
| Blood Cancer                 | (ref) |       |         |       | (ref)                |        |         |       |
| Breast Cancer                | 2.48  | 1.82  | 3.38    | 0.000 | 12.93                | 7.20   | 23.20   | 0.000 |
| Colorectal Cancer            | 2.04  | 1.51  | 2.77    | 0.000 | 7.78                 | 4.34   | 13.96   | 0.000 |
| Lymphoma                     | 1.09  | 0.77  | 1.54    | 0.622 | 1.44                 | 0.73   | 2.84    | 0.298 |
| Melanoma                     | 1.20  | 0.86  | 1.69    | 0.282 | 6.31                 | 3.46   | 11.52   | 0.000 |
| Other Cancer                 | 1.33  | 0.90  | 1.95    | 0.151 | 3.95                 | 2.02   | 7.73    | 0.000 |
| Prostate                     | 1.78  | 1.31  | 2.43    | 0.000 | 4.36                 | 2.41   | 7.90    | 0.000 |
| No Mets                      | (ref) |       |         |       | (ref)                |        |         |       |
| Primary Mets                 | 1.13  | 0.88  | 1.44    | 0.335 | 0.79                 | 0.59   | 1.07    | 0.133 |
| Secondary Mets               | 1.08  | 0.83  | 1.42    | 0.564 | 0.62                 | 0.42   | 0.91    | 0.015 |
| Unsure Mets                  | 1.20  | 0.97  | 1.50    | 0.099 | 1.32                 | 1.03   | 1.70    | 0.029 |
| Adults                       | (ref) |       |         |       | (ref)                |        |         |       |
| AYA                          | 0.67  | 0.46  | 0.98    | 0.040 | 0.49                 | 0.28   | 0.85    | 0.011 |
| Female                       | (ref) |       |         |       | (ref)                |        |         |       |
| Male                         | 0.74  | 0.62  | 0.87    | 0.000 | 0.74                 | 0.60   | 0.91    | 0.004 |
| Rural                        | (ref) |       |         |       | (ref)                |        |         |       |
| Urban                        | 0.76  | 0.67  | 0.86    | 0.000 | 0.78                 | 0.68   | 0.89    | 0.000 |
| Undergraduate or College     | (ref) |       |         |       | (ref)                |        |         |       |
| Graduate Degree              | 1.01  | 0.84  | 1.23    | 0.880 | 0.73                 | 0.57   | 0.93    | 0.011 |
| Highschool or Less           | 1.09  | 0.96  | 1.23    | 0.195 | 1.17                 | 1.01   | 1.35    | 0.034 |
| Middle Income                | (ref) |       |         |       | (ref)                |        |         |       |
| High Income                  | 0.84  | 0.73  | 0.96    | 0.012 | 0.90                 | 0.77   | 1.05    | 0.188 |
| Low income                   | 1.06  | 0.89  | 1.27    | 0.519 | 0.89                 | 0.72   | 1.10    | 0.296 |
| Single                       | (ref) |       |         |       | (ref)                |        |         |       |
| Divorced/ Separated/ Widowed | 0.86  | 0.67  | 1.11    | 0.261 | 1.09                 | 0.81   | 1.48    | 0.563 |
| Married/ Partner             | 0.97  | 0.78  | 1.23    | 0.828 | 1.08                 | 0.81   | 1.43    | 0.600 |
| Employed                     |       |       |         |       |                      |        |         |       |
| Unpaid Work                  | 0.89  | 0.79  | 1.01    | 0.076 | 0.95                 | 0.82   | 1.09    | 0.471 |
| Unemployed                   | 0.70  | 0.50  | 1.00    | 0.047 | 0.80                 | 0.53   | 1.20    | 0.276 |

Analytical sample n = 6659

**Table S2.** Binomial Log Regression of Perceptions of Involvement with Follow-Up Cancer Care

|                              | <b>RR</b> | <b>Involved<br/>95% CI</b> |      | <b>P-Value</b> |
|------------------------------|-----------|----------------------------|------|----------------|
| (Intercept)                  | 1.15      | 0.80                       | 1.65 | 0.464          |
| No Careplan Received         | (ref)     |                            |      |                |
| Careplan Received            | 1.95      | 1.75                       | 2.17 | 0.000          |
| Blood Cancer                 | (ref)     |                            |      |                |
| Breast Cancer                | 1.93      | 1.45                       | 2.57 | 0.000          |
| Colorectal Cancer            | 1.65      | 1.24                       | 2.19 | 0.001          |
| Lymphoma                     | 1.54      | 1.11                       | 2.13 | 0.009          |
| Melanoma                     | 0.93      | 0.69                       | 1.26 | 0.640          |
| Other Cancer                 | 1.72      | 1.20                       | 2.47 | 0.003          |
| Prostate                     | 1.49      | 1.12                       | 1.98 | 0.007          |
| No Mets                      | (ref)     |                            |      |                |
| Primary Mets                 | 1.04      | 0.83                       | 1.31 | 0.753          |
| Secondary Mets               | 0.94      | 0.72                       | 1.22 | 0.622          |
| Unsure Mets                  | 1.05      | 0.86                       | 1.29 | 0.614          |
| Adults                       | (ref)     |                            |      |                |
| AYA                          | 0.57      | 0.40                       | 0.80 | 0.001          |
| Female                       | (ref)     |                            |      |                |
| Male                         | 0.89      | 0.76                       | 1.04 | 0.129          |
| Rural                        | (ref)     |                            |      |                |
| Urban                        | 0.81      | 0.72                       | 0.91 | 0.000          |
| Undergraduate or College     | (ref)     |                            |      |                |
| Graduate Degree              | 0.90      | 0.76                       | 1.07 | 0.235          |
| Highschool or Less           | 1.14      | 1.01                       | 1.28 | 0.033          |
| Middle Income                | (ref)     |                            |      |                |
| High Income                  | 0.84      | 0.74                       | 0.95 | 0.005          |
| Low income                   | 1.33      | 1.12                       | 1.60 | 0.002          |
| Single                       | (ref)     |                            |      |                |
| Divorced/ Separated/ Widowed | 0.91      | 0.71                       | 1.16 | 0.448          |
| Married/ Partner             | 0.97      | 0.78                       | 1.21 | 0.776          |
| Employed                     | (ref)     |                            |      |                |
| Unpaid Work                  | 0.97      | 0.86                       | 1.08 | 0.543          |
| Unemployed                   | 0.70      | 0.51                       | 0.95 | 0.023          |

Analytic sample n = 6725

**Table S3.** GP Understands what I need when it comes to follow-up cancer care

|                              | RR    | Disagree |      | P-Value | RR    | Agree  |      | P-Value |
|------------------------------|-------|----------|------|---------|-------|--------|------|---------|
|                              |       | 95%CI    |      |         |       | 95% CI |      |         |
| (Intercept)                  | 1.47  | 0.73     | 2.94 | 0.279   | 2.40  | 1.44   | 3.99 | 0.001   |
| No SCP Received              | (ref) |          |      |         | (ref) |        |      |         |
| Received SCP                 | 1.02  | 0.81     | 1.29 | 0.844   | 2.16  | 1.85   | 2.51 | 0.000   |
| Oncologist                   | (ref) |          |      |         | (ref) |        |      |         |
| Oncologist and PCP           | 0.77  | 0.58     | 1.01 | 0.057   | 2.53  | 2.13   | 3.01 | 0.000   |
| PCP                          | 1.11  | 0.83     | 1.48 | 0.501   | 2.22  | 1.82   | 2.72 | 0.000   |
| Blood Cancer                 | (ref) |          |      |         | (ref) |        |      |         |
| Breast Cancer                | 0.99  | 0.58     | 1.68 | 0.966   | 1.42  | 0.96   | 2.09 | 0.077   |
| Colorectal Cancer            | 0.84  | 0.49     | 1.43 | 0.519   | 1.26  | 0.86   | 1.84 | 0.238   |
| Lymphoma                     | 0.91  | 0.50     | 1.65 | 0.759   | 1.26  | 0.82   | 1.94 | 0.284   |
| Melanoma                     | 0.87  | 0.48     | 1.56 | 0.636   | 1.54  | 1.02   | 2.34 | 0.042   |
| Other Cancer                 | 0.87  | 0.44     | 1.70 | 0.682   | 1.42  | 0.87   | 2.31 | 0.161   |
| Prostate                     | 0.67  | 0.38     | 1.17 | 0.157   | 1.25  | 0.86   | 1.83 | 0.245   |
| No Mets                      | (ref) |          |      |         | (ref) |        |      |         |
| Primary Mets                 | 1.14  | 0.75     | 1.75 | 0.533   | 0.84  | 0.62   | 1.14 | 0.263   |
| Secondary Mets               | 1.46  | 0.86     | 2.47 | 0.161   | 0.99  | 0.69   | 1.42 | 0.949   |
| Unsure Mets                  | 1.07  | 0.71     | 1.59 | 0.756   | 0.86  | 0.65   | 1.13 | 0.273   |
| Adults                       | (ref) |          |      |         | (ref) |        |      |         |
| AYA                          | 1.25  | 0.67     | 2.34 | 0.483   | 0.85  | 0.52   | 1.39 | 0.521   |
| Female                       | (ref) |          |      |         | (ref) |        |      |         |
| Male                         | 0.62  | 0.45     | 0.85 | 0.003   | 1.02  | 0.82   | 1.27 | 0.869   |
| Rural                        | (ref) |          |      |         | (ref) |        |      |         |
| Urban                        | 0.91  | 0.71     | 1.15 | 0.410   | 0.85  | 0.73   | 1.00 | 0.044   |
| Undergraduate or College     | (ref) |          |      |         | (ref) |        |      |         |
| Graduate Degree              | 1.18  | 0.83     | 1.67 | 0.368   | 1.14  | 0.89   | 1.46 | 0.315   |
| Highschool or Less           | 0.84  | 0.66     | 1.07 | 0.165   | 0.95  | 0.81   | 1.12 | 0.568   |
| Middle Income                | (ref) |          |      |         | (ref) |        |      |         |
| High Income                  | 0.95  | 0.74     | 1.22 | 0.702   | 0.90  | 0.76   | 1.07 | 0.251   |
| Low income                   | 0.77  | 0.52     | 1.15 | 0.199   | 1.16  | 0.91   | 1.48 | 0.233   |
| Single                       | (ref) |          |      |         | (ref) |        |      |         |
| Divorced/ Separated/ Widowed | 0.71  | 0.43     | 1.18 | 0.191   | 0.72  | 0.50   | 1.02 | 0.066   |
| Married/ Partner             | 0.80  | 0.51     | 1.25 | 0.322   | 0.77  | 0.56   | 1.06 | 0.114   |
| Employed                     | (ref) |          |      |         | (ref) |        |      |         |
| Unpaid Work                  | 0.64  | 0.51     | 0.81 | 0.000   | 1.02  | 0.87   | 1.19 | 0.838   |
| Unemployed                   | 1.80  | 0.96     | 3.39 | 0.068   | 1.61  | 0.97   | 2.68 | 0.065   |

Analytic sample n = 6260

**Table S4.** GP knows where to find other supports and services to help in my follow-up cancer care

|                              | Disagree |       |         |       | Agree |        |         |       |
|------------------------------|----------|-------|---------|-------|-------|--------|---------|-------|
|                              | RR       | 95%CI | P-Value |       | RR    | 95% CI | P-Value |       |
| (Intercept)                  | 0.85     | 0.40  | 1.80    | 0.675 | 1.78  | 1.08   | 2.91    | 0.022 |
| No SCP Received              | (ref)    |       |         |       | (ref) |        |         |       |
| Received SCP                 | 0.71     | 0.55  | 0.92    | 0.009 | 1.74  | 1.50   | 2.01    | 0.000 |
| Oncologist                   | (ref)    |       |         |       | (ref) |        |         |       |
| Oncologist and PCP           | 0.73     | 0.54  | 0.98    | 0.038 | 2.08  | 1.76   | 2.46    | 0.000 |
| PCP                          | 1.02     | 0.74  | 1.39    | 0.920 | 1.82  | 1.50   | 2.20    | 0.000 |
| Blood Cancer                 | (ref)    |       |         |       | (ref) |        |         |       |
| Breast Cancer                | 0.83     | 0.47  | 1.47    | 0.532 | 1.33  | 0.91   | 1.94    | 0.147 |
| Colorectal Cancer            | 0.95     | 0.53  | 1.68    | 0.852 | 1.30  | 0.90   | 1.90    | 0.167 |
| Lymphoma                     | 0.99     | 0.52  | 1.90    | 0.987 | 1.37  | 0.89   | 2.10    | 0.152 |
| Melanoma                     | 0.78     | 0.41  | 1.48    | 0.445 | 1.53  | 1.02   | 2.32    | 0.042 |
| Other Cancer                 | 0.87     | 0.41  | 1.83    | 0.717 | 1.37  | 0.84   | 2.24    | 0.207 |
| Prostate                     | 0.90     | 0.49  | 1.65    | 0.725 | 1.47  | 1.01   | 2.15    | 0.045 |
| No Mets                      | (ref)    |       |         |       | (ref) |        |         |       |
| Primary Mets                 | 1.37     | 0.87  | 2.15    | 0.174 | 0.92  | 0.68   | 1.24    | 0.571 |
| Secondary Mets               | 1.22     | 0.65  | 2.28    | 0.534 | 1.10  | 0.76   | 1.59    | 0.608 |
| Unsure Mets                  | 1.26     | 0.83  | 1.92    | 0.273 | 0.91  | 0.70   | 1.20    | 0.518 |
| Adults                       | (ref)    |       |         |       | (ref) |        |         |       |
| AYA                          | 1.72     | 0.82  | 3.58    | 0.148 | 1.71  | 0.99   | 2.94    | 0.054 |
| Female                       | (ref)    |       |         |       | (ref) |        |         |       |
| Male                         | 0.47     | 0.33  | 0.67    | 0.000 | 0.90  | 0.73   | 1.12    | 0.361 |
| Rural                        | (ref)    |       |         |       | (ref) |        |         |       |
| Urban                        | 1.01     | 0.78  | 1.31    | 0.946 | 0.82  | 0.70   | 0.95    | 0.011 |
| Undergraduate or College     | (ref)    |       |         |       | (ref) |        |         |       |
| Graduate Degree              | 0.80     | 0.54  | 1.20    | 0.278 | 1.00  | 0.79   | 1.27    | 0.997 |
| Highschool or Less           | 0.90     | 0.70  | 1.17    | 0.440 | 0.97  | 0.82   | 1.13    | 0.665 |
| Middle Income                | (ref)    |       |         |       | (ref) |        |         |       |
| High Income                  | 1.16     | 0.88  | 1.52    | 0.290 | 0.98  | 0.83   | 1.16    | 0.804 |
| Low income                   | 1.07     | 0.70  | 1.62    | 0.763 | 1.35  | 1.05   | 1.72    | 0.018 |
| Single                       | (ref)    |       |         |       | (ref) |        |         |       |
| Divorced/ Separated/ Widowed | 0.82     | 0.48  | 1.39    | 0.452 | 0.88  | 0.63   | 1.22    | 0.432 |
| Married/ Partner             | 1.00     | 0.62  | 1.60    | 0.998 | 1.08  | 0.80   | 1.46    | 0.625 |
| Employed                     | (ref)    |       |         |       | (ref) |        |         |       |
| Unpaid Work                  | 0.75     | 0.58  | 0.96    | 0.025 | 1.25  | 1.07   | 1.46    | 0.004 |
| Unemployed                   | 2.07     | 1.11  | 3.86    | 0.022 | 1.48  | 0.92   | 2.39    | 0.107 |

Analytic sample n = 6011

**Table S5.** General practitioner is able to refer me directly to other supports and services to help in my follow-up cancer care

|                              | Disagree |       |      |         | Agree |        |      |         |
|------------------------------|----------|-------|------|---------|-------|--------|------|---------|
|                              | RR       | 95%CI |      | P-Value | RR    | 95% CI |      | P-Value |
| (Intercept)                  | 0.91     | 0.43  | 1.90 | 0.797   | 1.38  | 0.84   | 2.26 | 0.203   |
| No SCP Received              | (ref)    |       |      |         | (ref) |        |      |         |
| Received SCP                 | 0.65     | 0.50  | 0.85 | 0.001   | 1.54  | 1.32   | 1.78 | 0.000   |
| Oncologist                   | (ref)    |       |      |         | (ref) |        |      |         |
| Oncologist and PCP           | 0.78     | 0.57  | 1.05 | 0.102   | 2.24  | 1.88   | 2.66 | 0.000   |
| PCP                          | 0.97     | 0.70  | 1.33 | 0.829   | 1.85  | 1.52   | 2.26 | 0.000   |
| Blood Cancer                 | (ref)    |       |      |         | (ref) |        |      |         |
| Breast Cancer                | 0.87     | 0.50  | 1.51 | 0.621   | 1.62  | 1.11   | 2.37 | 0.012   |
| Colorectal Cancer            | 0.94     | 0.54  | 1.67 | 0.843   | 1.52  | 1.05   | 2.21 | 0.027   |
| Lymphoma                     | 0.93     | 0.49  | 1.74 | 0.811   | 1.39  | 0.91   | 2.12 | 0.126   |
| Melanoma                     | 0.87     | 0.45  | 1.65 | 0.666   | 2.06  | 1.35   | 3.13 | 0.001   |
| Other Cancer                 | 0.51     | 0.24  | 1.12 | 0.094   | 1.37  | 0.85   | 2.22 | 0.194   |
| Prostate                     | 0.89     | 0.49  | 1.63 | 0.710   | 1.58  | 1.08   | 2.30 | 0.018   |
| No Mets                      | (ref)    |       |      |         | (ref) |        |      |         |
| Primary Mets                 | 1.31     | 0.83  | 2.07 | 0.252   | 0.81  | 0.60   | 1.10 | 0.177   |
| Secondary Mets               | 1.27     | 0.69  | 2.34 | 0.435   | 0.94  | 0.65   | 1.35 | 0.734   |
| Unsure Mets                  | 1.69     | 1.12  | 2.56 | 0.013   | 0.98  | 0.74   | 1.30 | 0.883   |
| Adults                       | (ref)    |       |      |         | (ref) |        |      |         |
| AYA                          | 1.82     | 0.88  | 3.74 | 0.104   | 1.56  | 0.93   | 2.61 | 0.091   |
| Female                       | (ref)    |       |      |         | (ref) |        |      |         |
| Male                         | 0.49     | 0.34  | 0.70 | 0.000   | 1.08  | 0.86   | 1.34 | 0.507   |
| Rural                        | (ref)    |       |      |         | (ref) |        |      |         |
| Urban                        | 1.11     | 0.85  | 1.45 | 0.450   | 0.86  | 0.73   | 1.01 | 0.063   |
| Undergraduate or College     | (ref)    |       |      |         | (ref) |        |      |         |
| Graduate Degree              | 0.77     | 0.50  | 1.18 | 0.232   | 1.14  | 0.89   | 1.47 | 0.298   |
| Highschool or Less           | 0.91     | 0.70  | 1.18 | 0.478   | 1.04  | 0.88   | 1.22 | 0.636   |
| Middle Income                | (ref)    |       |      |         | (ref) |        |      |         |
| High Income                  | 1.02     | 0.77  | 1.35 | 0.876   | 0.93  | 0.79   | 1.11 | 0.439   |
| Low income                   | 0.94     | 0.61  | 1.44 | 0.764   | 1.31  | 1.02   | 1.69 | 0.033   |
| Single                       | (ref)    |       |      |         | (ref) |        |      |         |
| Divorced/ Separated/ Widowed | 0.75     | 0.44  | 1.27 | 0.279   | 0.97  | 0.70   | 1.36 | 0.879   |
| Married/ Partner             | 0.90     | 0.56  | 1.43 | 0.644   | 1.15  | 0.85   | 1.56 | 0.358   |
| Employed                     | (ref)    |       |      |         | (ref) |        |      |         |
| Unpaid Work                  | 0.83     | 0.64  | 1.07 | 0.149   | 1.27  | 1.08   | 1.49 | 0.003   |
| Unemployed                   | 1.00     | 0.52  | 1.89 | 0.989   | 0.98  | 0.64   | 1.49 | 0.913   |

Analytic sample n = 5961

**Table S6.** Confidence in GP to meet follow-up care needs

|                              | Disagree |       |      |         | Agree |        |      |         |
|------------------------------|----------|-------|------|---------|-------|--------|------|---------|
|                              | RR       | 95%CI |      | P-Value | RR    | 95% CI |      | P-Value |
| (Intercept)                  | 1.44     | 0.76  | 2.74 | 0.266   | 1.91  | 1.13   | 3.22 | 0.016   |
| No SCP Received              | (ref)    |       |      |         | (ref) |        |      |         |
| Received SCP                 | 0.78     | 0.63  | 0.95 | 0.016   | 1.83  | 1.57   | 2.14 | 0.000   |
| Oncologist                   | (ref)    |       |      |         | (ref) |        |      |         |
| Oncologist and PCP           | 0.69     | 0.54  | 0.88 | 0.002   | 2.46  | 2.06   | 2.94 | 0.000   |
| PCP                          | 1.09     | 0.82  | 1.45 | 0.557   | 3.15  | 2.52   | 3.93 | 0.000   |
| Blood Cancer                 | (ref)    |       |      |         | (ref) |        |      |         |
| Breast Cancer                | 0.79     | 0.48  | 1.29 | 0.348   | 1.08  | 0.71   | 1.64 | 0.732   |
| Colorectal Cancer            | 0.66     | 0.40  | 1.09 | 0.107   | 1.02  | 0.68   | 1.55 | 0.908   |
| Lymphoma                     | 0.92     | 0.53  | 1.58 | 0.755   | 1.03  | 0.65   | 1.64 | 0.890   |
| Melanoma                     | 0.62     | 0.36  | 1.05 | 0.078   | 1.02  | 0.65   | 1.58 | 0.937   |
| Other Cancer                 | 0.86     | 0.46  | 1.60 | 0.625   | 1.26  | 0.74   | 2.12 | 0.396   |
| Prostate                     | 0.72     | 0.44  | 1.19 | 0.204   | 1.11  | 0.73   | 1.68 | 0.625   |
| No Mets                      | (ref)    |       |      |         | (ref) |        |      |         |
| Primary Mets                 | 1.31     | 0.89  | 1.91 | 0.168   | 0.78  | 0.57   | 1.08 | 0.134   |
| Secondary Mets               | 1.33     | 0.81  | 2.16 | 0.256   | 1.02  | 0.69   | 1.50 | 0.913   |
| Unsure Mets                  | 1.44     | 1.01  | 2.06 | 0.043   | 0.91  | 0.68   | 1.22 | 0.537   |
| Adults                       | (ref)    |       |      |         | (ref) |        |      |         |
| AYA                          | 1.20     | 0.66  | 2.18 | 0.541   | 1.01  | 0.61   | 1.67 | 0.981   |
| Female                       | (ref)    |       |      |         | (ref) |        |      |         |
| Male                         | 0.67     | 0.50  | 0.90 | 0.007   | 1.02  | 0.81   | 1.28 | 0.847   |
| Rural                        | (ref)    |       |      |         | (ref) |        |      |         |
| Urban                        | 1.00     | 0.81  | 1.24 | 0.981   | 0.87  | 0.74   | 1.03 | 0.101   |
| Undergraduate or College     | (ref)    |       |      |         | (ref) |        |      |         |
| Graduate Degree              | 1.17     | 0.86  | 1.59 | 0.321   | 0.96  | 0.74   | 1.23 | 0.739   |
| Highschool or Less           | 0.90     | 0.72  | 1.12 | 0.346   | 1.06  | 0.90   | 1.26 | 0.490   |
| Middle Income                | (ref)    |       |      |         | (ref) |        |      |         |
| High Income                  | 0.88     | 0.70  | 1.10 | 0.259   | 0.93  | 0.78   | 1.11 | 0.410   |
| Low income                   | 0.91     | 0.64  | 1.28 | 0.571   | 1.30  | 1.01   | 1.69 | 0.046   |
| Single                       | (ref)    |       |      |         | (ref) |        |      |         |
| Divorced/ Separated/ Widowed | 1.30     | 0.83  | 2.03 | 0.254   | 0.97  | 0.69   | 1.37 | 0.877   |
| Married/ Partner             | 1.54     | 1.03  | 2.31 | 0.035   | 1.19  | 0.88   | 1.61 | 0.269   |
| Employed                     | (ref)    |       |      |         | (ref) |        |      |         |
| Unpaid Work                  | 0.77     | 0.62  | 0.95 | 0.015   | 1.07  | 0.91   | 1.27 | 0.400   |
| Unemployed                   | 1.85     | 1.01  | 3.40 | 0.046   | 1.62  | 0.95   | 2.77 | 0.076   |

Analytic sample n = 6316
